# Supplementary material
Source: PubMed Central journal article supplement (PMC2722447)

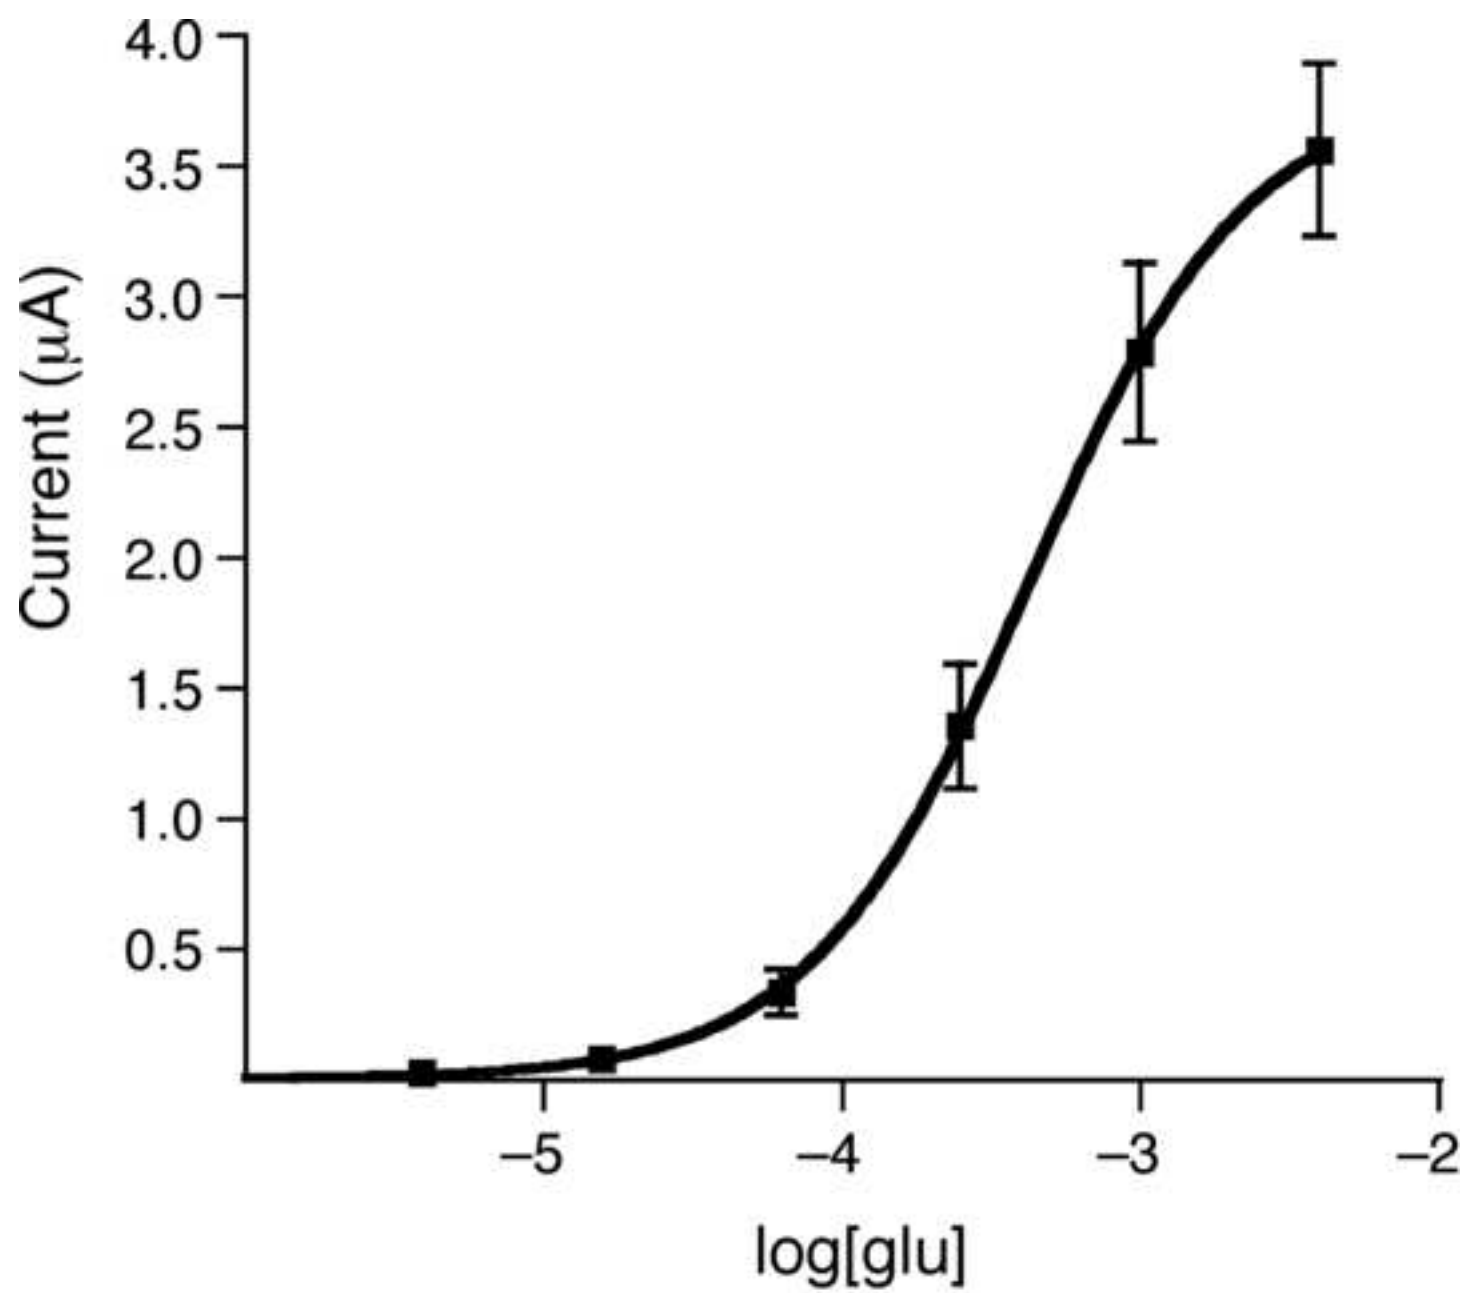

Supplementary Figure 1

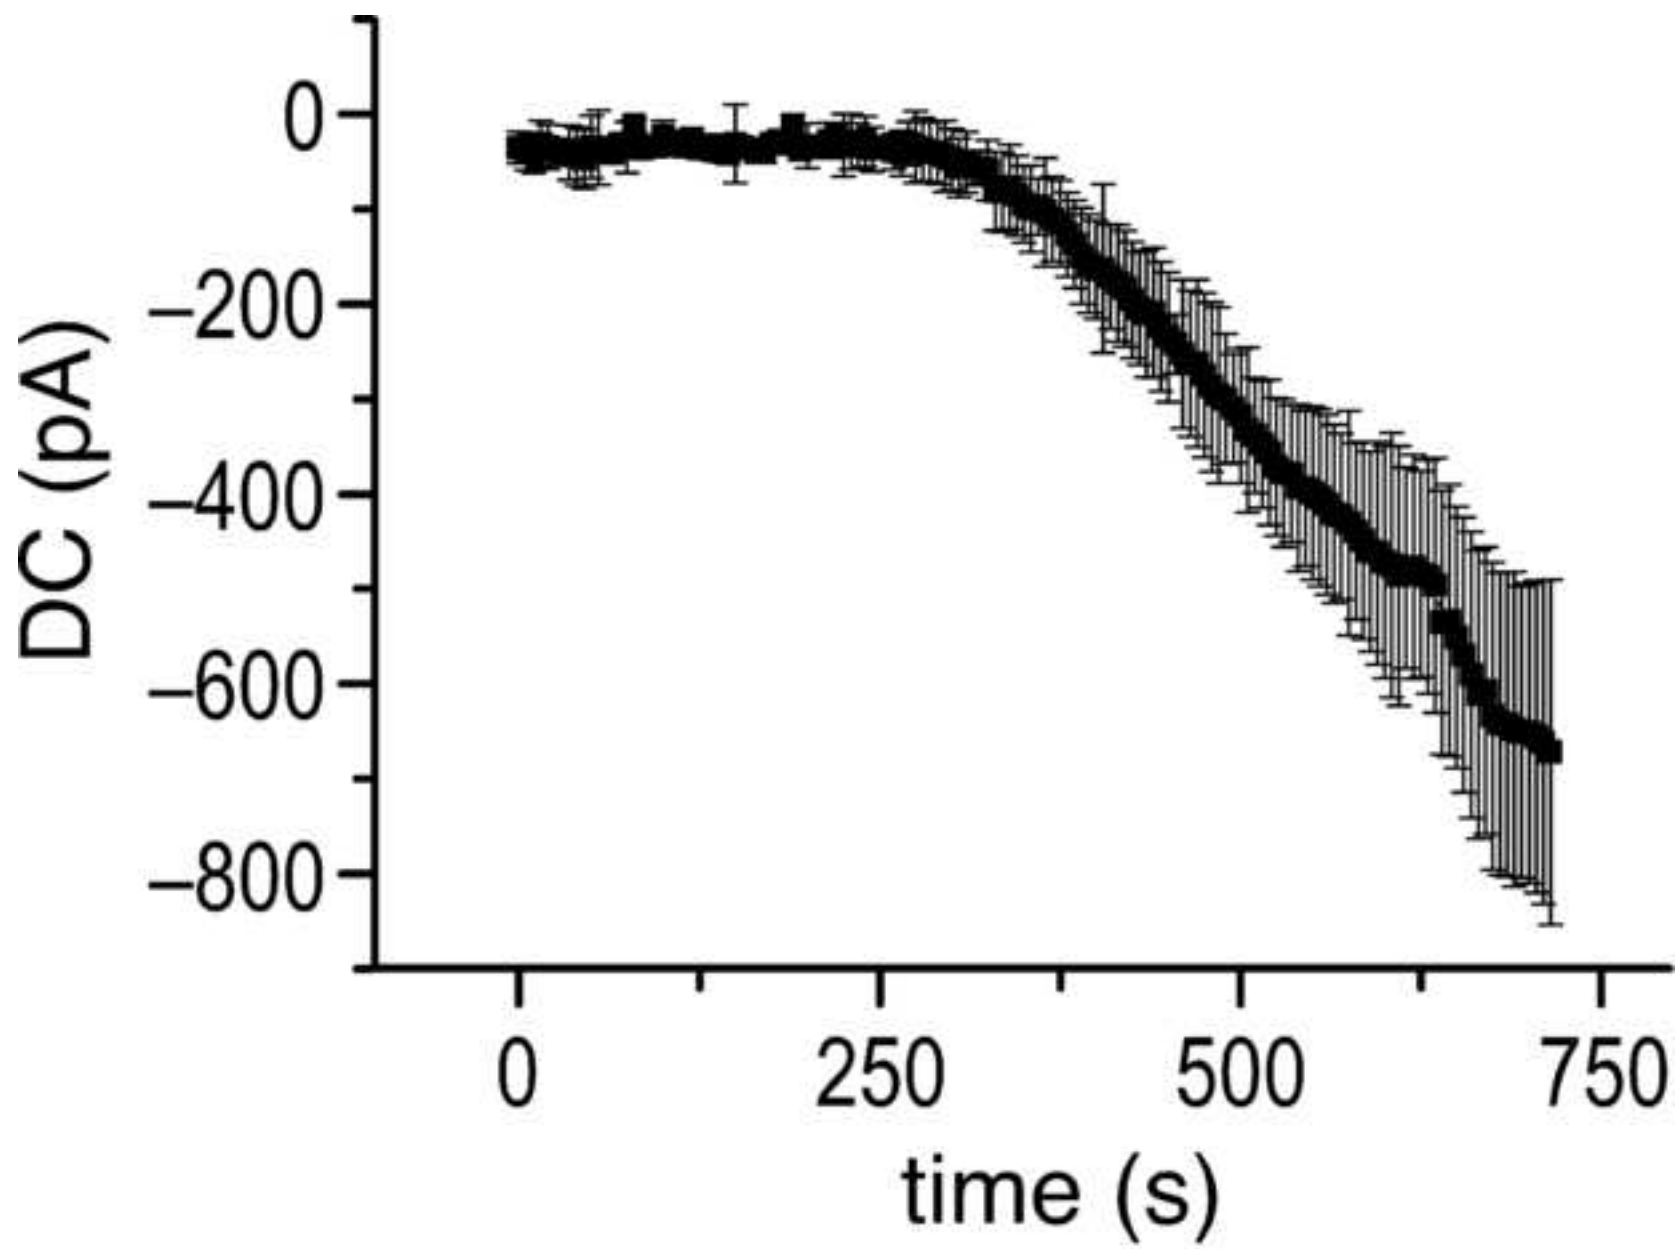

**Supplementary Figure 2**

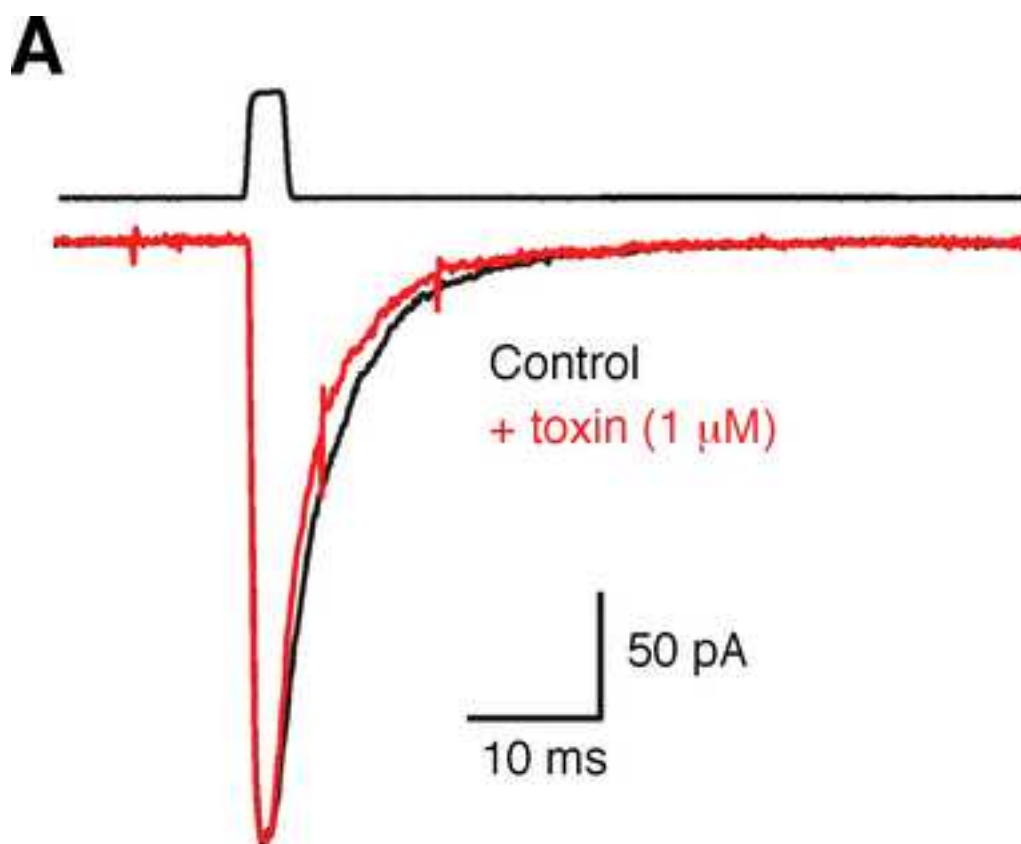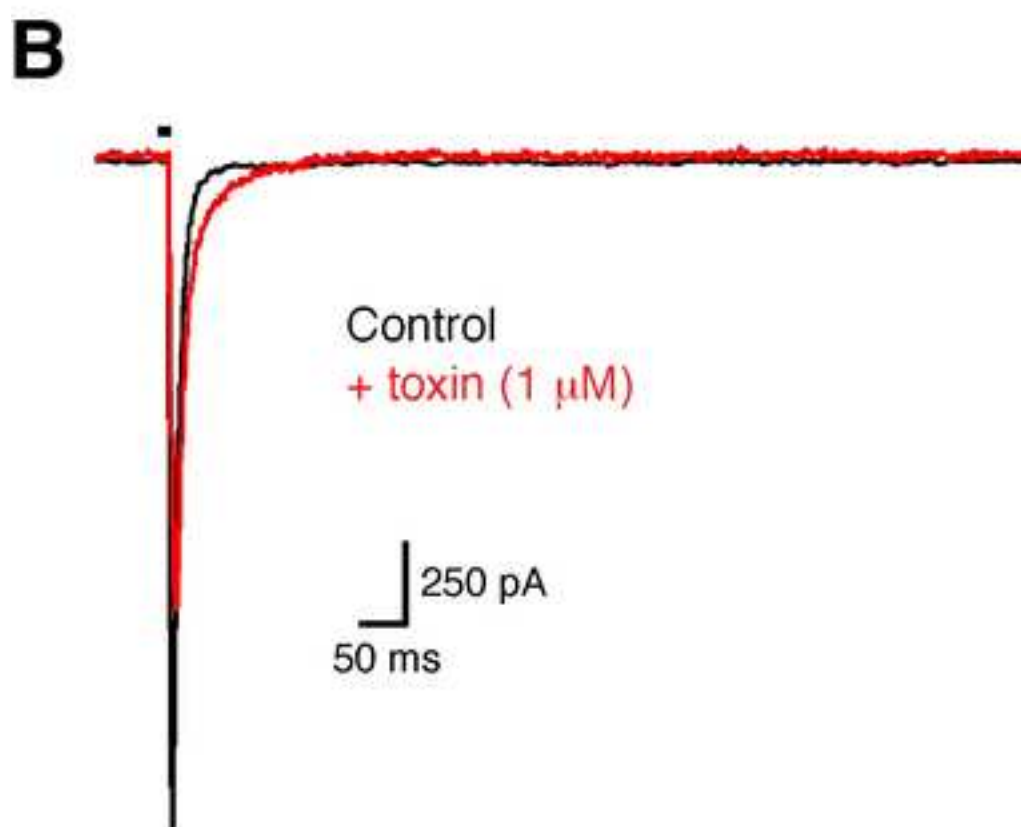

Supplementary Figure 3

Supplement: NIHMS123417-supplement-01.pdf [file NIHMS123417-supplement-01.pdf]
